# Supplementary material for: Small deviations in kinematics and body form dictate muscle performances in the finely tuned avian downstroke
Source: eLife journal article supplement (doi:10.7554/elife.89968), 2023-08-31
Supplement: supp1 [file elife-89968-supp1-v1.pdf]

**Supplementary File 1a.** Air conditions across all 20 flights. ( $N = 4$  doves;  $n = 5$  flights each).

| Variable                                      | Mean $\pm$ s.d.   |
|-----------------------------------------------|-------------------|
| Air density [ $\text{kg}\cdot\text{m}^{-3}$ ] | $1.191 \pm 0.001$ |
| Air temperature [ $^{\circ}\text{C}$ ]        | $23.73 \pm 0.28$  |
| Air pressure [kPa]                            | $101.78 \pm 0.06$ |
| Air relative humidity [%]                     | $27.05 \pm 6.75$  |

**Supplementary File 1b.** Measured aerodynamic and leg impulses before surgery, after surgery, and after surgery with the suspended recording cable (for recording EMG & sonomicrometry). So that horizontal and vertical impulses can be compared, gravity has been subtracted from the vertical impulse, so that while at rest, the vertical impulse is zero (horizontal and vertical impulse scaled by bodyweight, bw and integration time; bodyweight is based on the average vertical force on the takeoff perch before takeoff).

| Variable                                         | Before surgery | After surgery<br>(no cable) | After surgery<br>(with cable) |
|--------------------------------------------------|----------------|-----------------------------|-------------------------------|
| Total bodyweight measured by takeoff perch [g]   | 158.4 ± 0.8    | 159.1 ± 3.6                 | 170.0 ± 1.1                   |
| Vertical takeoff impulse (perch) [-]             | 0.39 ± 0.03    | 0.34 ± 0.03                 | 0.29 ± 0.05                   |
| Vertical aerodynamic impulse (all strokes) [-]   | -0.22 ± 0.02   | -0.28 ± 0.04                | -0.23 ± 0.06                  |
| Vertical landing impulse (perch) [-]             | 0.09 ± 0.07    | 0.12 ± 0.15                 | -0.09 ± 0.13                  |
| Vertical total impulse [-]                       | 0.03 ± 0.01    | 0.03 ± 0.03                 | 0.01 ± 0.01                   |
| Vertical aerodynamic impulse (stroke 2) [-]      | 0.06 ± 0.04    | -0.22 ± 0.03                | -0.17 ± 0.06                  |
| Horizontal takeoff impulse (perch) [-]           | 0.81 ± 0.03    | 0.56 ± 0.05                 | 0.64 ± 0.03                   |
| Horizontal aerodynamic impulse (all strokes) [-] | -0.09 ± 0.02   | -0.03 ± 0.01                | 0.02 ± 0.03                   |
| Horizontal landing impulse (perch) [-]           | -0.35 ± 0.04   | -0.43 ± 0.14                | -0.42 ± 0.19                  |
| Horizontal total impulse [-]                     | 0.03 ± 0.03    | 0.01 ± 0.01                 | 0.08 ± 0.01                   |
| Horizontal aerodynamic impulse (stroke 2) [-]    | -0.11 ± 0.05   | 0.08 ± 0.04                 | 0.15 ± 0.02                   |

**Supplementary File 1c.** Measured aerodynamic and leg impulses among individual doves. The definition for impulse matches Supplementary File 1b.

| Variable                                         | Dove 1       | Dove 2       | Dove 3       | Dove 4       | All doves    |
|--------------------------------------------------|--------------|--------------|--------------|--------------|--------------|
| Total bodyweight measured by takeoff perch [g]   | 152.6 ± 0.9  | 166.7 ± 3.4  | 170.0 ± 1.1  | 182.3 ± 1.7  | 167.9 ± 11.0 |
| Vertical takeoff impulse (perch) [-]             | 0.34 ± 0.04  | 0.26 ± 0.11  | 0.29 ± 0.05  | 0.23 ± 0.06  | 0.28 ± 0.08  |
| Vertical aerodynamic impulse (all strokes) [-]   | -0.19 ± 0.03 | -0.26 ± 0.09 | -0.23 ± 0.06 | -0.18 ± 0.06 | -0.22 ± 0.07 |
| Vertical landing impulse (perch) [-]             | -0.09 ± 0.05 | -0.25 ± 0.16 | -0.09 ± 0.13 | -0.16 ± 0.11 | -0.15 ± 0.13 |
| Vertical total impulse [-]                       | 0.00 ± 0.01  | -0.01 ± 0.02 | 0.01 ± 0.01  | 0.02 ± 0.01  | 0.01 ± 0.02  |
| Vertical aerodynamic impulse (stroke 2) [-]      | -0.05 ± 0.05 | -0.21 ± 0.09 | -0.17 ± 0.06 | -0.13 ± 0.06 | -0.14 ± 0.09 |
| Horizontal takeoff impulse (perch) [-]           | 0.77 ± 0.06  | 0.69 ± 0.03  | 0.64 ± 0.03  | 0.44 ± 0.04  | 0.63 ± 0.13  |
| Horizontal aerodynamic impulse (all strokes) [-] | -0.09 ± 0.02 | -0.01 ± 0.02 | 0.02 ± 0.03  | 0.05 ± 0.02  | -0.01 ± 0.06 |
| Horizontal landing impulse (perch) [-]           | -0.29 ± 0.02 | -0.12 ± 0.13 | -0.42 ± 0.19 | -0.34 ± 0.14 | -0.29 ± 0.16 |
| Horizontal total impulse [-]                     | 0.08 ± 0.03  | 0.10 ± 0.01  | 0.08 ± 0.01  | 0.08 ± 0.01  | 0.08 ± 0.02  |
| Horizontal aerodynamic impulse (stroke 2) [-]    | -0.09 ± 0.01 | -0.03 ± 0.09 | 0.15 ± 0.02  | 0.17 ± 0.03  | 0.05 ± 0.13  |

**Supplementary File 1d.** Measured aerodynamic forces for the second stroke after takeoff (Figure 3). The weight of the dove is primarily supported during the downstroke. Drag partially contributes to weight support, while opposing forward aerodynamic force. The reported values are the stroke-averaged aerodynamic force measured by the Aerodynamic Force Platform (AFP), normalized by bodyweight. We compute the time-resolved lift and drag using the measured horizontal and vertical aerodynamic forces together with the measured wing velocity. ( $N = 4$  doves;  $n = 5$  flights each; mean  $\pm$  standard deviation).

| Stroke-averaged aerodynamic force / bodyweight [%] | Entire stroke    | Downstroke       | Upstroke         | Lift              | Drag              |
|----------------------------------------------------|------------------|------------------|------------------|-------------------|-------------------|
| Weight support (vertical force)                    | 87.28 $\pm$ 9.94 | 76.00 $\pm$ 7.60 | 11.28 $\pm$ 2.81 | 66.17 $\pm$ 10.81 | 21.11 $\pm$ 4.62  |
| Horizontal force                                   | 5.21 $\pm$ 12.60 | 2.52 $\pm$ 11.74 | 2.68 $\pm$ 1.49  | 32.84 $\pm$ 9.96  | -27.64 $\pm$ 4.64 |

**Supplementary File 1e.** We compute aerodynamic, inertial, and required muscle power based on first principals (Figure 4), and model the effect of the amount of energy storage in the supracoracoideus (Figure 5). The primary component of stroke-averaged net muscle power is aerodynamic, whereas the positive and negative regions of inertial power cancel. Our energy storage model predicts that the pectoralis would need to generate  $24.9\% \pm 17.5\%$  more power to fully power the upstroke via energy storage in the supracoracoideus. ( $N = 4$  doves;  $n = 5$  flights each; mean  $\pm$  standard deviation).

| Stroke-averaged power / pectoralis mass [W/kg] | Aerodynamic       | Inertial          | Muscle            | Pectoralis: no energy storage | Pectoralis: 100% energy storage |
|------------------------------------------------|-------------------|-------------------|-------------------|-------------------------------|---------------------------------|
| Net power                                      | $210.0 \pm 56.9$  | $-1.4 \pm 20.0$   | $207.6 \pm 56.6$  | $181.8 \pm 47.6$              | $231.7 \pm 59.6$                |
| Positive power                                 | $222.4 \pm 51.5$  | $80.0 \pm 21.9$   | $249.3 \pm 59.8$  | $206.0 \pm 49.6$              | $255.9 \pm 62.7$                |
| Negative power                                 | $-13.5 \pm 10.3$  | $-81.4 \pm 22.8$  | $-41.7 \pm 22.2$  | $-24.2 \pm 15.3$              | $-24.2 \pm 15.3$                |
| Max power                                      | $775.3 \pm 179.0$ | $348.0 \pm 112.5$ | $711.3 \pm 150.7$ | $734.5 \pm 165.5$             | varies                          |
