# Supplementary material for: Small deviations in kinematics and body form dictate muscle performances in the finely tuned avian downstroke
Source: eLife journal article supplement (doi:10.7554/elife.89968), 2023-08-31
Supplement: supp2 [file elife-89968-supp2-v1.pdf]

**Supplementary File 2a.** Scaling analysis (Figure 7) parameter summary.

| Variable                      | Scaling equation | Description                                                             | Method for acquiring                                                                                                                                                |
|-------------------------------|------------------|-------------------------------------------------------------------------|---------------------------------------------------------------------------------------------------------------------------------------------------------------------|
| $m_{\text{body}}$             |                  | Body mass                                                               | Measured extant bird data from literature (31 birds)                                                                                                                |
| $m_{\text{pect}}$             |                  | Pectoralis mass (single pectoralis)                                     | Measured extant bird data from literature scaled isometrically to match body mass (exact match: 25 birds, close relative: 6 birds)                                  |
| $m_{\text{wing}}$             |                  | Wing mass (single wing)                                                 | Measured extant bird data from literature (31 birds)                                                                                                                |
| $I_{\text{wing}}$             |                  | Wing moment of inertia (single wing)                                    | Measured extant bird data from literature (27 birds) or determined based on scaling law reported in literature: Berg & Rayner 1995 (close relative: 4 birds)        |
| $ \vec{r}_{\text{span}} $     |                  | Wingspan (distance from shoulder joint to wingtip; single wing)         | Measured extant bird data from literature (27 birds) or measured extant bird data from literature scaled isometrically to match body mass (close relative: 4 birds) |
| $ \vec{r}_{\text{wing, cg}} $ |                  | Distance from shoulder joint to center of gravity of wing (single wing) | Measured extant bird data from literature (27 birds) or determined isometrically to match body mass (close relative: 4 birds)                                       |
| $S_{\text{wing}}$             |                  | Wing area (single wing)                                                 | Measured extant bird data from literature (27 birds) or measured extant bird data                                                                                   |

|                                      |                                                                                                                                                                                                               |                                                                                                                                                                                     |                                                                                                                                               |
|--------------------------------------|---------------------------------------------------------------------------------------------------------------------------------------------------------------------------------------------------------------|-------------------------------------------------------------------------------------------------------------------------------------------------------------------------------------|-----------------------------------------------------------------------------------------------------------------------------------------------|
|                                      |                                                                                                                                                                                                               |                                                                                                                                                                                     | from literature scaled isometrically to match body mass (close relative: 4 birds)                                                             |
| $f$                                  |                                                                                                                                                                                                               | Wingbeat frequency                                                                                                                                                                  | Measured extant bird data from literature (21 birds) or determined based on scaling law reported in literature: Berg & Rayner 1995 (10 birds) |
| $m_{\text{wing},i}$                  |                                                                                                                                                                                                               | Wing mass distribution (point masses)                                                                                                                                               | Least-squares fit to match wing mass, inertia, and center of gravity data                                                                     |
| $\Delta t$                           | $\propto f^{-1}$                                                                                                                                                                                              | Time step                                                                                                                                                                           | Assumed to scale isometrically                                                                                                                |
| $\vec{\mathbf{F}}_{\text{aero}}$     | $\propto m_{\text{body}}$                                                                                                                                                                                     | Aerodynamic force                                                                                                                                                                   | Assumed to scale isometrically                                                                                                                |
| $N \vec{\mathbf{v}}_{\text{wing}}^i$ | $\propto f  \vec{\mathbf{r}}_{\text{span}} $                                                                                                                                                                  | Wing velocity (distributed)                                                                                                                                                         | Assumed to scale isometrically                                                                                                                |
| $N \vec{\mathbf{v}}_{\text{body}}$   | $\propto 1$                                                                                                                                                                                                   | Body velocity                                                                                                                                                                       | Unchanged                                                                                                                                     |
| $x_{\text{p,aero}}$                  | $=  \vec{\mathbf{r}}_{\text{span}}  f$                                                                                                                                                                        | Scaling parameter which dictates the aerodynamic power contribution $\propto$ wingtip speed                                                                                         | Derived (Eqn. S71)                                                                                                                            |
| $x_{\text{m,aero}}$                  | $=  \vec{\mathbf{r}}_{\text{span}} $                                                                                                                                                                          | Scaling parameter which dictates the aerodynamic moment contribution = wingspan                                                                                                     | Derived (Eqn. S72)                                                                                                                            |
| $x_{\text{p,iner}}$                  | $= \frac{I_{\text{wing}}}{m_{\text{body}}} f^3$ $= \frac{m_{\text{wing}}}{m_{\text{body}}} \left( \frac{r_{\text{gyr}}}{ \vec{\mathbf{r}}_{\text{span}} } \right)^2 (f  \vec{\mathbf{r}}_{\text{span}} )^2 f$ | Scaling parameter which dictates the inertial power contribution $\propto$ (wing mass %) (wing radius of gyration %) <sup>2</sup> (wingtip speed) <sup>2</sup> (wingbeat frequency) | Derived (Eqn. S73)                                                                                                                            |

|              |                                                                                                                                                            |                                                                                                                                                                 |                    |
|--------------|------------------------------------------------------------------------------------------------------------------------------------------------------------|-----------------------------------------------------------------------------------------------------------------------------------------------------------------|--------------------|
| $x_{m,iner}$ | $= \frac{I_{wing}}{m_{body}} f^2$ $= \frac{m_{wing}}{m_{body}} \left( \frac{r_{gyr}}{ \bar{\mathbf{r}}_{span} } \right)^2 (f  \bar{\mathbf{r}}_{span} )^2$ | Scaling parameter which dictates the inertial moment contribution $\propto$ (wing mass %) (wing radius of gyration %) <sup>2</sup> (wingtip speed) <sup>2</sup> | Derived (Eqn. S74) |
|--------------|------------------------------------------------------------------------------------------------------------------------------------------------------------|-----------------------------------------------------------------------------------------------------------------------------------------------------------------|--------------------|

**Supplementary File 2b.** Scaling analysis parameters used for analyzing shifts in the timing of the pectoralis power distribution during the stroke (Figure 7D).

| Variable                  | Scaling equation | Description                                                     | Method for acquiring                                                                                                                                |
|---------------------------|------------------|-----------------------------------------------------------------|-----------------------------------------------------------------------------------------------------------------------------------------------------|
| $m_{\text{body}}$         |                  | Body mass                                                       | Measured extant bird data from literature (17 birds)                                                                                                |
| $m_{\text{wing}}$         |                  | Wing mass (single wing)                                         | Measured extant bird data from literature (1 birds) or measured extant bird data from literature scaled isometrically to match body mass (16 birds) |
| $ \bar{r}_{\text{span}} $ |                  | Wingspan (distance from shoulder joint to wingtip; single wing) | Measured extant bird data from literature (3 birds) or measured extant bird data from literature scaled isometrically to match body mass (14 birds) |
| $f$                       |                  | Wingbeat frequency                                              | Measured extant bird data from literature (17 birds)                                                                                                |
| EMG <sub>start</sub>      |                  | Start of electrical activation of pectoralis (stroke %)         | Measured extant bird data from literature (17 birds)                                                                                                |
| EMG <sub>end</sub>        |                  | End of electrical activation of pectoralis (stroke %)           | Measured extant bird data from literature (17 birds)                                                                                                |
| F <sub>pect,max</sub>     |                  | Max force generated by pectoralis (stroke %)                    | Measured extant bird data from literature (12 birds)                                                                                                |
| $I_{\text{wing}}$         |                  | Wing moment of inertia (single wing)                            | Determined based on scaling law reported in literature: Berg & Rayner 1995 (17 birds)                                                               |

|                           |                                                                                                                                                                                       |                                                                                             |         |
|---------------------------|---------------------------------------------------------------------------------------------------------------------------------------------------------------------------------------|---------------------------------------------------------------------------------------------|---------|
| $x_{p,iner} / x_{p,aero}$ | $= x_{m,iner} / x_{m,aero}$ $= \frac{I_{wing}}{m_{body}  \vec{r}_{span} } f^2$ $= \frac{m_{wing}}{m_{body}} \left( \frac{r_{gyr}}{ \vec{r}_{span} } \right)^2 (f  \vec{r}_{span} ) f$ | Scaling parameter which dictates the aerodynamic power contribution $\propto$ wingtip speed | Derived |
|---------------------------|---------------------------------------------------------------------------------------------------------------------------------------------------------------------------------------|---------------------------------------------------------------------------------------------|---------|
