# Supplementary material for: Small deviations in kinematics and body form dictate muscle performances in the finely tuned avian downstroke
Source: eLife journal article supplement (doi:10.7554/elife.89968), 2023-08-31
Supplement: supp3 [file elife-89968-supp3-v1.pdf]

**Supplementary File 3a.** Detailed breakdown of data from extant birds used for the scaling analysis (Figure 7). Some data was scaled isometrically by bodyweight based on matching the species of the bird (blue). Other data was found based on published scaling relationships (green). The references corresponding to the letter plus number keys (found in columns titled Src) are in Supplementary File 3c. To match some of the bird species, a close relative was used when data was missing for the original species: Close relative of *Parus ater* used was *Parus cristatus mitratus*. Close relative of *Perisoreus canadensis* used was *Xanthoura yncas*. Close relative of *Pica hudsonia* used was *Pica pica*. Close relative of *Corvus brachyrhynchos* used was *Corvus vorone*. Close relative of *Alectoris rufa* used was *Coturnix*. Close relative of *Corvus corax* used was *Corvus vornix*.

| Bird                      |              | Body mass [g] |     | Single pectoralis mass [g] |     | Single wing mass [g] |     | Wingspan: shoulder joint to wingtip [mm] |     | Center of gravity dist. to shoulder joint [mm] |     | Single wing moment of inertia [10 <sup>6</sup> ·kg·m <sup>2</sup> ] |     | Wing area [cm <sup>2</sup> ] |     | Wingbeat frequency [Hz] |     |
|---------------------------|--------------|---------------|-----|----------------------------|-----|----------------------|-----|------------------------------------------|-----|------------------------------------------------|-----|---------------------------------------------------------------------|-----|------------------------------|-----|-------------------------|-----|
| Scientific name           | Common name  | #             | Src | #                          | Src | #                    | Src | #                                        | Src | #                                              | Src | #                                                                   | Src | #                            | Src | #                       | Src |
| <i>Parus caeruleus</i>    | Blue tit     | 9.5           | B95 | 0.764                      | G62 | 0.48                 | B95 | 95                                       | B95 | 18                                             | B95 | 0.286                                                               | B95 | 42.4                         | B95 | 21.7                    | B95 |
| <i>Poephila guttata</i>   | Zebra finch  | 14.5          | B95 | 0.98                       | T05 | 0.63                 | B95 | 90                                       | B95 | 19                                             | B95 | 0.356                                                               | B95 | 33                           | B95 | 27.4                    | B95 |
| <i>Parus ater</i>         | Coal tit     | 14.6          | B95 | 1.016                      | G62 | 0.84                 | B95 | 112                                      | B95 | 21                                             | B95 | 0.673                                                               | B95 | 51.9                         | B95 | 18.2                    | B95 |
| <i>Erithacus rubecula</i> | Robin        | 15            | B95 | 0.904                      | G62 | 0.69                 | B95 | 108                                      | B95 | 22                                             | B95 | 0.581                                                               | B95 | 46.5                         | B95 | 16.1                    | B95 |
| <i>Delichon urbica</i>    | House martin | 15.2          | B95 | 1.006                      | G62 | 0.85                 | B95 | 140                                      | B95 | 30                                             | B95 | 1.348                                                               | B95 | 51.5                         | B95 | 9.4                     | B95 |
| <i>Fringilla coelebs</i>  | Chaffinch    | 19.9          | B95 | 2.33                       | G62 | 1.1                  | B95 | 116                                      | B95 | 23                                             | B95 | 1.007                                                               | B95 | 55.8                         | B95 | 17.3                    | B95 |

| Bird                         |                          | Body mass [g] |      | Single pectoralis mass [g] |     | Single wing mass [g] |     | Wingspan: shoulder joint to wingtip [mm] |     | Center of gravity dist. to shoulder joint [mm] |     | Single wing moment of inertia [ $10^6 \cdot \text{kg} \cdot \text{m}^2$ ] |     | Wing area [ $\text{cm}^2$ ] |     | Wingbeat frequency [Hz] |      |
|------------------------------|--------------------------|---------------|------|----------------------------|-----|----------------------|-----|------------------------------------------|-----|------------------------------------------------|-----|---------------------------------------------------------------------------|-----|-----------------------------|-----|-------------------------|------|
| Scientific name              | Common name              | #             | Src  | #                          | Src | #                    | Src | #                                        | Src | #                                              | Src | #                                                                         | Src | #                           | Src | #                       | Src  |
| <i>Alcedo atthis</i>         | Common kingfisher        | 34.3          | B95  | 2.836                      | G62 | 1.55                 | B95 | 130                                      | B95 | 30                                             | B95 | 2.344                                                                     | B95 | 62                          | B95 | 15.6                    | B95  |
| <i>Turdus merula</i>         | Blackbird                | 56.2          | B95  | 4.48                       | G62 | 3.14                 | B95 | 184                                      | B95 | 42                                             | B95 | 9.115                                                                     | B95 | 127.8                       | B95 | 8.6                     | B95  |
| <i>Sturnus vulgaris</i>      | European starling        | 58.1          | B95  | 5.48                       | G62 | 3.7                  | B95 | 185                                      | B95 | 41                                             | B95 | 10.16                                                                     | B95 | 120.8                       | B95 | 11.3                    | B95  |
| <i>Picoides major</i>        | Great spotted woodpecker | 62.9          | B95  | 5.6                        | G62 | 4.17                 | B95 | 190                                      | B95 | 42                                             | B95 | 11.15                                                                     | B95 | 121.8                       | B95 | 10.4                    | B95  |
| <i>Turdus philomelos</i>     | Song thrush              | 67.6          | B95  | 6.73                       | G62 | 3.39                 | B95 | 171                                      | B95 | 33                                             | B95 | 6.098                                                                     | B95 | 103.5                       | B95 | 10.0                    | B95  |
| <i>Perisoreus canadensis</i> | Gray jay                 | 68.9          | J11A | 4.5                        | G62 | 4.48                 | G62 | 172                                      | G62 | 36                                             | B95 | 10.89                                                                     | B95 | 154                         | G62 | 11.6                    | J11A |
| <i>Alle alle</i>             | Dovekie (little auk)     | 100           | B95  | 7.02                       | G62 | 5.04                 | B95 | 183                                      | B95 | 46                                             | B95 | 16.18                                                                     | B95 | 65                          | B95 | 9.4                     | B95  |
| <i>Coturnix coturnix</i>     | Quail                    | 132           | B95  | 11.7                       | G62 | 4                    | B95 | 164                                      | B95 | 37                                             | B95 | 8.482                                                                     | B95 | 91.8                        | B95 | 17.8                    | B95  |
| <i>Podiceps ruficollis</i>   | Little grebe             | 146           | B95  | 5.94                       | G62 | 4.56                 | B95 | 194                                      | B95 | 53                                             | B95 | 20.03                                                                     | B95 | 110.1                       | B95 | 10.2                    | B95  |

| Bird                        |                      | Body mass [g] |      | Single pectoralis mass [g] |      | Single wing mass [g] |      | Wingspan: shoulder joint to wingtip [mm] |      | Center of gravity dist. to shoulder joint [mm] |      | Single wing moment of inertia [ $10^6 \cdot \text{kg} \cdot \text{m}^2$ ] |      | Wing area [ $\text{cm}^2$ ] |      | Wingbeat frequency [Hz] |      |
|-----------------------------|----------------------|---------------|------|----------------------------|------|----------------------|------|------------------------------------------|------|------------------------------------------------|------|---------------------------------------------------------------------------|------|-----------------------------|------|-------------------------|------|
| Scientific name             | Common name          | #             | Src  | #                          | Src  | #                    | Src  | #                                        | Src  | #                                              | Src  | #                                                                         | Src  | #                           | Src  | #                       | Src  |
| <i>Streptopelia risoria</i> | Ringneck dove        | 161.6         | CURR | 14.66                      | CURR | 8.62                 | CURR | 217                                      | CURR | 52                                             | CURR | 35.3                                                                      | CURR | 182.6                       | CURR | 9.8                     | CURR |
| <i>Scolopax rusticola</i>   | Woodcock             | 163           | B95  | 20.75                      | G62  | 12.45                | B95  | 279                                      | B95  | 68                                             | B95  | 84.98                                                                     | B95  | 254.2                       | B95  | 6.9                     | B95  |
| <i>Pica hudsonia</i>        | Black-billed magpie  | 172.4         | J11A | 11                         | G62  | 12.6                 | G62  | 218                                      | G62  | 46                                             | B95  | 52.67                                                                     | B95  | 277                         | G62  | 9.0                     | J11A |
| <i>Picus viridis</i>        | Green woodpecker     | 179           | B95  | 14.57                      | G62  | 11.75                | B95  | 235                                      | B95  | 51                                             | B95  | 47.54                                                                     | B95  | 231                         | B95  | 8.3                     | B95  |
| <i>Larus ridibundus</i>     | Black-headed gull    | 256           | B95  | 16.33                      | G62  | 18.98                | B95  | 461                                      | B95  | 118                                            | B95  | 402.5                                                                     | B95  | 442.2                       | B95  | 3.5                     | B95  |
| <i>Accipiter nisus</i>      | Eurasian sparrowhawk | 279           | B95  | 28.47                      | G62  | 22.61                | B95  | 355                                      | B95  | 93                                             | B95  | 263                                                                       | B95  | 377                         | B95  | 4.5                     | B95  |
| <i>Columba livia</i>        | Rock pigeon          | 293           | B95  | 27.63                      | T08  | 22.47                | B95  | 323                                      | B95  | 71                                             | B95  | 172.7                                                                     | B95  | 314                         | B95  | 6.7                     | B95  |
| <i>Corvus frugilegus</i>    | Rook                 | 328           | B95  | 24.15                      | G62  | 28.78                | B95  | 389                                      | B95  | 80                                             | B95  | 326.9                                                                     | B95  | 419.8                       | B95  | 4.0                     | B95  |
| <i>Gallinula chloropus</i>  | Grey moorhen         | 364           | B95  | 22.66                      | G62  | 14.2                 | B95  | 271                                      | B95  | 65                                             | B95  | 95.58                                                                     | B95  | 254.9                       | B95  | 7.2                     | B95  |

| Bird                         |                          | Body mass [g] |      | Single pectoralis mass [g] |     | Single wing mass [g] |     | Wingspan: shoulder joint to wingtip [mm] |     | Center of gravity dist. to shoulder joint [mm] |     | Single wing moment of inertia [ $10^6 \cdot \text{kg} \cdot \text{m}^2$ ] |     | Wing area [ $\text{cm}^2$ ] |     | Wingbeat frequency [Hz] |      |
|------------------------------|--------------------------|---------------|------|----------------------------|-----|----------------------|-----|------------------------------------------|-----|------------------------------------------------|-----|---------------------------------------------------------------------------|-----|-----------------------------|-----|-------------------------|------|
| Scientific name              | Common name              | #             | Src  | #                          | Src | #                    | Src | #                                        | Src | #                                              | Src | #                                                                         | Src | #                           | Src | #                       | Src  |
| <i>Corvus brachyrhynchos</i> | American crow            | 387.6         | J11A | 27.6                       | G62 | 30.8                 | G62 | 302                                      | G62 | 63                                             | B95 | 261.3                                                                     | B95 | 465                         | G62 | 6.4                     | J11A |
| <i>Alectoris rufa</i>        | Red-legged partridge     | 393           | B95  | 39.3                       | G62 | 19.15                | B95 | 254                                      | B95 | 60                                             | B95 | 100.7                                                                     | B95 | 241.1                       | B95 | 7.7                     | B95  |
| <i>Strix aluco</i>           | Tawny owl                | 398           | B95  | 18.81                      | G62 | 31.41                | B95 | 421                                      | B95 | 111                                            | B95 | 578.5                                                                     | B95 | 617.7                       | B95 | 4.5                     | B95  |
| <i>Melanitta nigra</i>       | Common scoter            | 569           | B95  | 33.36                      | G62 | 38.85                | B95 | 390                                      | B95 | 108                                            | B95 | 656.6                                                                     | B95 | 422.6                       | B95 | 4.9                     | B95  |
| <i>Uria aalge</i>            | Common murre (guillemot) | 691           | B95  | 50.63                      | G62 | 31.07                | B95 | 335                                      | B95 | 100                                            | B95 | 424.8                                                                     | B95 | 241.6                       | B95 | 9.4                     | B95  |
| <i>Buteo buteo</i>           | Common buzzard           | 771           | B95  | 42.6                       | G62 | 72.51                | B95 | 590                                      | B95 | 155                                            | B95 | 2536                                                                      | B95 | 1142                        | B95 | 3.2                     | B95  |
| <i>Corvus corax</i>          | Common raven             | 894.9         | J11A | 65.6                       | G62 | 67.9                 | G62 | 342                                      | G62 | 72                                             | B95 | 773.6                                                                     | B95 | 829                         | G62 | 5.6                     | J11A |
| <i>Ardea cinerea</i>         | Grey heron               | 2140          | B95  | 164.9                      | G62 | 167.1                | B95 | 830                                      | B95 | 216                                            | B95 | 12334                                                                     | B95 | 1997                        | B95 | 2.6                     | B95  |

**Supplementary File 3b.** Detailed breakdown of data from extant birds used for analyzing shifts in the timing of the pectoralis power distribution during the stroke for the scaling analysis (Figure 7D). The same color scheme is used as in Supplementary File 3a, and the close relative species used when data was missing for the original species are: Close relative of *Selasphorus rufus* used was *Calypte anna*. Close relative of *Perisoreus canadensis* used was *Xanthoura yncas*. Close relative of *Pica hudsonia* used was *Pica pica*. Close relative of *Corvus brachyrhynchos* used was *Corvus corone*. Close relative of *Alectoris chukar* used was *Caccabis rufa*. Close relative of *Corvus corax* used was *Corvus cornix*.

| Bird                         |                    | Flight mode              | Body mass [g] |      | Single wing mass [g] |     | Wingspan: shoulder joint to wingtip [mm] |     | Single wing moment of inertia [ $10^6 \cdot \text{kg} \cdot \text{m}^2$ ] |     | Wingbeat frequency [Hz] |      | Pectoralis EMG start & end time [stroke %] |       |      | Max pectoralis force time [stroke %] |      |
|------------------------------|--------------------|--------------------------|---------------|------|----------------------|-----|------------------------------------------|-----|---------------------------------------------------------------------------|-----|-------------------------|------|--------------------------------------------|-------|------|--------------------------------------|------|
| Scientific name              | Common name        |                          | #             | Src  | #                    | Src | #                                        | Src | #                                                                         | Src | #                       | Src  | Start                                      | End   | Src  | #                                    | Src  |
| <i>Selasphorus rufus</i>     | Rufous Hummingbird | 0-10 m/s                 | 3.4           | T10  | 0.084                | I18 | 45.5                                     | I18 | 0.0110                                                                    | B95 | 42                      | T10  | -29.3                                      | -8.8  | T10  |                                      |      |
| <i>Calypte anna</i>          | Anna's hummingbird | Hovering                 | 4.2           | D13  | 0.104                | I18 | 48.8                                     | I18 | 0.0159                                                                    | B95 | 40                      | D13  | -22.9                                      | -14.2 | D13  |                                      |      |
| <i>Calypte anna</i>          | Anna's hummingbird | Hovering                 | 4.9           | I18  | 0.121                | I18 | 51.4                                     | I18 | 0.0225                                                                    | I18 | 41                      | I18  | -25.4                                      | -16.0 | A10  | 4.2                                  | A10  |
| <i>Taeniopygia guttata</i>   | Zebra finch        |                          | 11.1          | D13  | 0.48                 | B95 | 82.3                                     | B95 | 0.231                                                                     | B95 | 27.1                    | D13  | -16.5                                      | 3.0   | D13  |                                      |      |
| <i>Taeniopygia guttata</i>   | Zebra finch        | Ave: ascend, 0, 2, 4 m/s | 13.3          | T05  | 0.58                 | B95 | 72                                       | T05 | 0.213                                                                     | B95 | 27                      | T05  | -14.5                                      | 27.7  | T05  |                                      |      |
| <i>Perisoreus canadensis</i> | Gray jay           | Takeoff                  | 68.9          | J11A | 4.48                 | G62 | 172                                      | G62 | 10.89                                                                     | B95 | 11.6                    | J11A | -9.7                                       | 30.8  | J11A | 30.5                                 | J11A |

| Bird                         |                     | Flight mode      | Body mass [g] |      | Single wing mass [g] |     | Wingspan: shoulder joint to wingtip [mm] |     | Single wing moment of inertia [ $10^6 \cdot \text{kg} \cdot \text{m}^2$ ] |     | Wingbeat frequency [Hz] |      | Pectoralis EMG start & end time [stroke %] |      |      | Max pectoralis force time [stroke %] |      |
|------------------------------|---------------------|------------------|---------------|------|----------------------|-----|------------------------------------------|-----|---------------------------------------------------------------------------|-----|-------------------------|------|--------------------------------------------|------|------|--------------------------------------|------|
| Scientific name              | Common name         |                  | #             | Src  | #                    | Src | #                                        | Src | #                                                                         | Src | #                       | Src  | Start                                      | End  | Src  | #                                    | Src  |
| <i>Sturnus vulgaris</i>      | European starling   | 13.7 m/s         | 71.7          | B92  | 4.55                 | B95 | 198                                      | B95 | 14.97                                                                     | B95 | 15                      | B92  | -19.4                                      | 20.9 | B92  | 28.4                                 | B92  |
| <i>Nymphicus hollandicus</i> | Cockatiel           | 7 m/s            | 85            | H03  | 8.1                  | H04 | 232                                      | H04 | 37.72                                                                     | B95 | 7.64                    | H03  | -27.9                                      | 17.1 | H03  | 13.0                                 | H03  |
| <i>Pica hudsonia</i>         | Black-billed magpie | Takeoff          | 172.4         | J11A | 12.6                 | G62 | 218                                      | G62 | 52.67                                                                     | B95 | 9                       | J11A | -9.4                                       | 28.2 | J11A | 14.0                                 | J11A |
| <i>Pica pica</i>             | Magpie              | 6 m/s            | 174           | D97  | 12.7                 | G62 | 219                                      | G62 | 53.45                                                                     | B95 | 8.5                     | D97  | -35.3                                      | 9.3  | D97  | 15.8                                 | D97  |
| <i>Columba livia</i>         | Pigeon              | Takeoff          | 309           | D93  | 23.6                 | B95 | 329                                      | B95 | 237.1                                                                     | B95 | 9                       | D93  | -28.1                                      | 27.2 | D93  | 16.5                                 | D93  |
| <i>Corvus brachyrhynchos</i> | American crow       | Takeoff          | 387.6         | J11A | 30.8                 | G62 | 302                                      | G62 | 261.3                                                                     | B95 | 6.4                     | J11A | -2.7                                       | 39.7 | J11A | 27.4                                 | J11A |
| <i>Columba livia</i>         | Rock pigeon         | Level flight     | 441.4         | J11B | 33.8                 | B95 | 370                                      | B95 | 441.1                                                                     | B95 | 8.9                     | J11B | -17.4                                      | 26.7 | J11B | 26.9                                 | J11B |
| <i>Columba livia</i>         | Rock pigeon         | Ascending flight | 452           | J11B | 34.6                 | B95 | 373                                      | B95 | 459.4                                                                     | B95 | 8.9                     | J11B | -18.9                                      | 26.1 | J11B | 26.5                                 | J11B |
| <i>Alectoris chukar</i>      | Chukar              | Adult flight     | 549           | T17  | 23.9                 | G62 | 172                                      | G62 | 62.72                                                                     | B95 | 22                      | T17  | -12.8                                      | 14.5 | T17  |                                      |      |
| <i>Columba livia</i>         | Rock pigeon         | 0-2 m/s          | 562           | T08  | 43                   | B95 | 330                                      | T08 | 445.9                                                                     | B95 | 8.6                     | T08  | -11.8                                      | 30.0 | T08  | 24.3                                 | T08  |

| Bird                |              | Flight mode | Body mass [g] |      | Single wing mass [g] |     | Wingspan: shoulder joint to wingtip [mm] |     | Single wing moment of inertia [ $10^6 \cdot \text{kg} \cdot \text{m}^2$ ] |     | Wingbeat frequency [Hz] |      | Pectoralis EMG start & end time [stroke %] |      |      | Max pectoralis force time [stroke %] |      |
|---------------------|--------------|-------------|---------------|------|----------------------|-----|------------------------------------------|-----|---------------------------------------------------------------------------|-----|-------------------------|------|--------------------------------------------|------|------|--------------------------------------|------|
| Scientific name     | Common name  |             | #             | Src  | #                    | Src | #                                        | Src | #                                                                         | Src | #                       | Src  | Start                                      | End  | Src  | #                                    | Src  |
| <i>Corvus corax</i> | Common raven | Takeoff     | 894.9         | J11A | 67.9                 | G62 | 342                                      | G62 | 773.6                                                                     | B95 | 5.6                     | J11A | -6.1                                       | 46.0 | J11A | 48.2                                 | J11A |

**Supplementary File 3c.** Keys for references in Supplementary Files 3a and 3b.

| Abbrev | Full source  |
|--------|--------------|
| CURR   | Current work |
| A10    | [1]          |
| B95    | [2]          |
| B92    | [3]          |
| D93    | [4]          |
| D97    | [5]          |
| D13    | [6]          |
| G62    | [7]          |
| H03    | [8]          |
| H04    | [9]          |
| I18    | [10]         |
| J11A   | [11]         |
| J11B   | [12]         |
| T05    | [13]         |
| T08    | [14]         |
| T10    | [15]         |
| T17    | [16]         |



## References

- [1] D. L. Altshuler *et al.*, “Neuromuscular control of wingbeat kinematics in Anna’s hummingbirds (*Calypte anna*),” *Journal of Experimental Biology*, vol. 213, no. 14, pp. 2507–2514, 2010, doi: 10.1242/jeb.043497.
- [2] C. Van Den Berg and J. M. V. Rayner, “The moment of inertia of bird wings and the inertial power requirement for flapping flight,” *J Exp Biol*, vol. 198, pp. 1655–64, 1995.
- [3] A. A. Biewener, K. P. Dial, and G. E. Goslow Jr., “Pectoralis Muscle Force and Power Output During Flight in the Starling,” *Journal of Experimental Biology*, vol. 164, no. 1, pp. 1–18, 1992.
- [4] K. P. Dial and A. A. Biewener, “Pectoralis Muscle Force and Power Output During Different Modes of Flight in Pigeons,” *J Exp Biol*, vol. 176, pp. 31–54, 1993.
- [5] K. P. Dial, A. A. Biewener, B. W. Tobalske, and D. R. Warrick, “Mechanical power output of bird flight,” *Nature*, vol. 390, no. 6655, pp. 67–70, 1997, doi: 10.1038/36330.
- [6] E. R. Donovan, B. K. Keeney, E. Kung, S. Makan, J. M. Wild, and D. L. Altshuler, “Muscle Activation Patterns and Motor Anatomy of Anna’s Hummingbirds *Calypte anna* and Zebra Finches *Taeniopygia guttata*,” *Physiological and Biochemical Zoology*, vol. 86, no. 1, pp. 27–46, 2013, doi: 10.1086/668697.
- [7] C. H. Greenewalt, “Dimensional relations for flying animals,” *Smithsonian Miscellaneous Collections*, vol. 144, no. 2, pp. 1–46, 1962, doi: 10.4324/9780203476154\_chapter\_13.
- [8] T. L. Hedrick, B. W. Tobalske, and A. A. Biewener, “How cockatiels (*Nymphicus hollandicus*) modulate pectoralis power output across flight speeds,” *J Exp Biol*, vol. 206, no. 8, pp. 1363–1378, 2003, doi: 10.1242/jeb.00272.
- [9] T. L. Hedrick, J. R. Usherwood, and A. A. Biewener, “Wing inertia and whole-body acceleration: an analysis of instantaneous aerodynamic force production in cockatiels (*Nymphicus hollandicus*) flying across a range of speeds,” *J Exp Biol*, vol. 207, no. 10, pp. 1689–1702, 2004, doi: 10.1242/jeb.00933.
- [10] R. Ingersoll and D. Lentink, “How the hummingbird wingbeat is tuned for efficient hovering,” *J Exp Biol*, vol. 221, 2018, doi: 10.1242/jeb.178228.
- [11] B. E. Jackson and K. P. Dial, “Scaling of mechanical power output during burst escape flight in the Corvidae,” *Journal of Experimental Biology*, vol. 214, no. 3, pp. 452–461, 2011, doi: 10.1242/jeb.046789.
- [12] B. E. Jackson, B. W. Tobalske, and K. P. Dial, “The broad range of contractile behaviour of the avian pectoralis: functional and evolutionary implications,” *Journal of Experimental Biology*, vol. 214, no. 14, pp. 2354–2361, 2011, doi: 10.1242/jeb.052829.
- [13] B. W. Tobalske, L. A. Puccinelli, and D. C. Sheridan, “Contractile activity of the pectoralis in the zebra finch according to mode and velocity of flap-bounding flight,” *J Exp Biol*, vol. 208, no. 15, pp. 2895–2901, 2005, doi: 10.1242/jeb.01734.

- [14] B. W. Tobalske and A. A. Biewener, "Contractile properties of the pigeon supracoracoideus during different modes of flight," *Journal of Experimental Biology*, vol. 211, no. 2, pp. 170–179, 2008, doi: 10.1242/jeb.007476.
- [15] B. W. Tobalske, A. A. Biewener, D. R. Warrick, T. L. Hedrick, and D. R. Powers, "Effects of flight speed upon muscle activity in hummingbirds," *Journal of Experimental Biology*, vol. 213, no. 14, pp. 2515–2523, 2010, doi: 10.1242/jeb.043844.
- [16] B. W. Tobalske, B. E. Jackson, and K. P. Dial, "Ontogeny of flight capacity and pectoralis function in a precocial ground bird (*alectoris chukar*)," *Integr Comp Biol*, vol. 57, no. 2, pp. 217–230, 2017, doi: 10.1093/icb/ix050.
